# Supplementary material for: Understanding Particulate Matter Retention and Wash-Off during Rainfall in Relation to Leaf Traits of Urban Forest Tree Species
Source: MDPI journal article supplement (doi:10.3390/horticulturae9020165), 2023-01-27
Supplement: s1 [file s1]

Archive with 1 entries (1 files):
- horticulturae-2110117-supplementary.pdf
